# Supplementary material for: Challenges experienced by nurse educators in promoting acquisition of clinical reasoning skills by the undergraduate nursing students: A qualitative exploratory study
Source: Research Square preprint supplement (doi:10.21203/rs.3.rs-3890486/v1), 2024-02-01
Supplement: Supplementary file 1 [file 6ce8cfa2492de33bf2da2c99.docx]

**Table 1 Summary of inductive thematic data analysis of challenges faced by nurse educators to promote acquisition of clinical reasoning skills by undergraduate nursing students.**

| **Themes** | **Subthemes** | **Relevant quotes** |
| --- | --- | --- |
| Clinical environment | - lack of interest in learning by undergraduate nursing students. - Lack of human resource - Shortage of resources in the clinical area | - *‘Individual interest of undergraduate nursing students’ varies’ some are not mature to handle situations’* ***p2.*** - *‘Some students are lazy and don’t like tasks that require them to think critically*’. **p2.** - ‘*Students are left alone without being accompanied by neither the nurse educators nor the clinical nurses*. *So, when undergraduate nursing students are left alone who is going to impart the clinical reasoning skills*? **P4.** - *You are drawn back when there are no resources, as such you tend to improvise. So, one would ask, will this improvision promote clinical reasoning skills when the undergraduate nursing students are not taught the ideal?’.* She further concluded by saying, *‘yes this might promote clinical reasoning as students need to think what to do. But the result is compromising the quality of care.* **p1***.* |
| Learning and teaching opportunities in both classroom and clinical area | - Knowledge gap between nurse educators and clinical nurses - Lack of qualified nurse educators - Increased numbers of undergraduate nursing students. - Limited time of exposure - Role modelling | - *she had noted a discrepancy when it came to performing of procedures among the nurse educators themselves as well as the clinical nurses.* - **‘***Sometimes* *there is knowledge gap between what undergraduate nursing students learn in class and what the clinical nurses in the ward know, for example management of diabetes mellitus.* ***p5*** - '*There are some inexperienced lecturers, most of the lecturers do not have the background of principles and practice of education. Such type of lecturers makes the students dull because these students are not equipped with the necessary knowledge to allow them to develop clinical reasoning skills****.*** *I feel there is a need to revisit both the curriculum and recruitment criteria if we are to promote the clinical reasoning skills of undergraduate nursing students.* ***p3.*** - *‘During our time there were manageable numbers say 10 to 15 nursing students per ward, and even the class size was of good size, but today the numbers have increased by three times in the wards and ten times in the classroom, so with such big numbers it becomes very difficult to observe each student as some tend to hide or they are playing on whatsup***.’p5** - *when you consider the large numbers of students you tend to think how you can just occupy your time, as you cannot reach everyone. So, others are left without being engaged in any patient care’*. p7. - *mastering of the procedure was a problem as there were short cuts from the clinical nurses.’* **p8.**   ‘*We need to allocate equal time to students to practice in skills laboratory as well as in the clinical area if the students must acquire the reasoning skills*.’**p10.** |
