# Supplementary material for: Challenges experienced by nurse educators in promoting acquisition of clinical reasoning skills by the undergraduate nursing students: A qualitative exploratory study
Source: Research Square preprint supplement (doi:10.21203/rs.3.rs-3890486/v1), 2024-02-01
Supplement: Supplementary file 2 [file 9e4d83131b329cb43e92b0ab.docx]

# Appendix (I) Data collection tool for Nurse Educators; Semi structured interview guide

**Title**: challenges experienced by nurse educators to promote acquisition of clinical reasoning skills by undergraduate nursing students

**Part1: Biography Particulars of the participant**

1. . How old are you -------------------?
2. What is your Sex------------------------?
3. What are your highest Qualifications-----------------------------------------?
4. How long have you been Working------------------------------------?

**Part 2 Questions on challenges faced by nursed educators to promote clinical reasoning acquisition.**

1. As a nurse educator at this university what is your classroom teaching experience

Probes: the teaching methods/ approaches used

Promotion of clinical reasoning

Probes: student numbers

Promoting critical and reasoning

1. How do you promote clinical reasoning in your teaching?
2. What challenges do you experience with teaching students’ nurses?
3. What suggestions do you have on promotion of clinical reasoning skills for the students?

Thank you very much
