# Supplementary figures and images for: Challenges experienced by nurse educators in promoting acquisition of clinical reasoning skills by the undergraduate nursing students: A qualitative exploratory study
Source: Research Square preprint supplement (doi:10.21203/rs.3.rs-3890486/v1), 2024-02-01

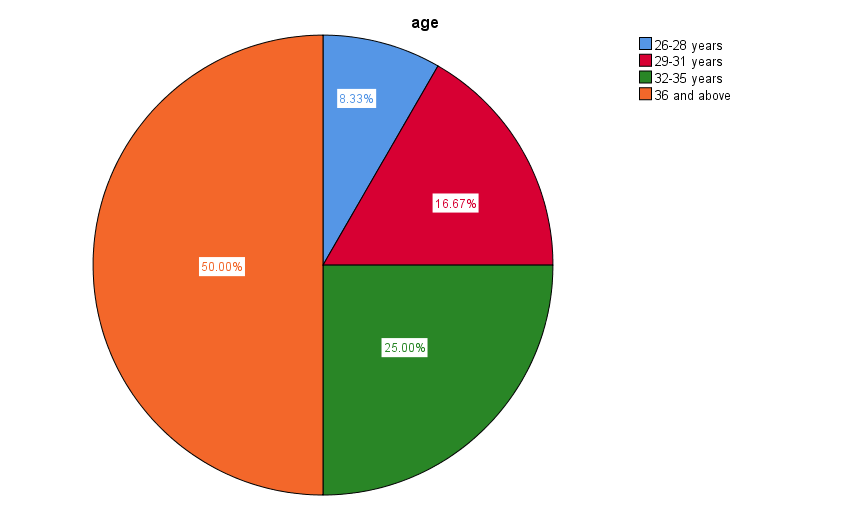


Figure 1. **Age group of nurse educators.**

Supplement: Supplementary file 3 [file e16fe91aac0beea0dea7c61a.docx]
